# Supplementary material
Source: publisher figshare collection journal article supplement (https://acs.figshare.com/ndownloader/files/5177167)

# Supporting Information

## Solid-Phase Intramolecular *N*-Acyliminium Pictet-Spengler Reactions as Crossroads to Scaffold Diversity

*Thomas E. Nielsen and Morten Meldal\**

Department of Chemistry, Carlsberg Laboratory, Gamle Carlsberg Vej 10, DK-2500  
Valby, Denmark

E-mail address of the corresponding author: [mpm@crc.dk](mailto:mpm@crc.dk)

### Contents:

|                                         |     |
|-----------------------------------------|-----|
| <b>Experimental</b>                     |     |
| General methods                         | S2  |
| <b><sup>1</sup>H NMR Spectra</b>        |     |
| Compounds <b>2e-g</b>                   | S4  |
| Compounds <b>14a-c</b>                  | S5  |
| Compounds <b>4a, 18a-b</b>              | S6  |
| Compounds <b>18c-e</b>                  | S7  |
| <b>Analytical RP-HPLC Chromatograms</b> |     |
| Compounds <b>4a-g</b>                   | S8  |
| Compounds <b>16a-g</b>                  | S9  |
| Compounds <b>16h-i</b>                  | S10 |

**General Methods.** All solvents were of HPLC quality and stored over molecular sieves. Solid-phase peptide chemistry and solid-phase organic chemistry were routinely carried out using plastic-syringe technique. Flat bottom PE syringes were equipped with sintered teflon filters (50  $\mu$ m pores), teflon tubing, and valves, which allow suction to be applied to the syringes below. For all reactions on solid support, PEGA<sub>800</sub> resin (0.4 mmol/g) was used. Prior to use, the resin was washed with methanol ( $\times$  6), DMF ( $\times$  6), and DCM ( $\times$  6). All commercially available reagents were used as received without further purification.

Analysis of all solid-phase reactions was performed after cleaving the products as their free acids from a resin sample. A small resin sample (<1 mg) was treated with 0.1 M aqueous NaOH (50  $\mu$ L) for 2 h. After neutralization with 0.1 M HCl (50  $\mu$ L), and addition of CH<sub>3</sub>CN (100  $\mu$ L), a sample (10  $\mu$ L) was analyzed by analytical RP-HPLC on an HPLC system using a C-18 column (4.5  $\times$  50 mm, 1 mL/min) with detection at 215 nm using a multiwavelength detector. Eluents A (0.1% TFA in water) and B (0.1% TFA in acetonitrile/water, 9:1) were used in a linear gradient (100% A  $\rightarrow$  100% B) in a run-time of 25 min. Collected fractions were analyzed by ESI MS on a QTOF mass spectrometer (mobile phase 50% CH<sub>3</sub>CN (aq), 0.1  $\mu$ L/min, sample conc.  $\sim$  10 pmol/ $\mu$ L). All compounds on which HRMS (ESI) analysis was performed exhibited clean <sup>1</sup>H NMR spectra and one spot on TLC analysis, or a single peak on analytical RP-HPLC.

Material sufficient for <sup>1</sup>H NMR analysis was obtained by cleaving a resin sample (50-100 mg) as described above. Solution phase NMR spectra were recorded on a 250 MHz spectrometer (proton frequency 250.13 MHz) at 30  $^{\circ}$ C. <sup>1</sup>H (250 MHz) NMR spectra were recorded using CDCl<sub>3</sub>, CD<sub>3</sub>CN, or DMSO-*d*<sub>6</sub>, as solvents, and chemical shifts were measured relative to the signals for CHCl<sub>3</sub> (7.26 ppm), CH<sub>3</sub>CN (1.94

ppm), or DMSO (2.50 ppm), respectively, whereas  $^{13}\text{C}$  (62.5 MHz) NMR spectra were recorded for all novel compounds synthesized in solution, and chemical shifts were measured relative to the signals for  $\text{CDCl}_3$  (77.0 ppm), or  $\text{CD}_3\text{CN}$  (1.2 ppm). The spectral width for the phase-sensitive (States-TPPI)  $^1\text{H}/^1\text{H}$ -NOESY (consult: Jeener, J.; Meier, B.H.; Bachmann, P.; Ernst, R.R. *J. Chem. Phys.* **1979**, *71*, 4546-4553) was 2 kHz with 2048 data points and 256 increments, each acquired with 8 scans and with a relaxation delay of 1.5 sec. The mixing time was 800 ms. The zero filled data was multiplied with a squared shifted sine bell function prior to Fourier transform to a final matrix size of 2048 x 1024.

## <sup>1</sup>H NMR Spectra.

<sup>1</sup>H NMR (250 MHz, CDCl<sub>3</sub>) of Aldehyde **14a**:

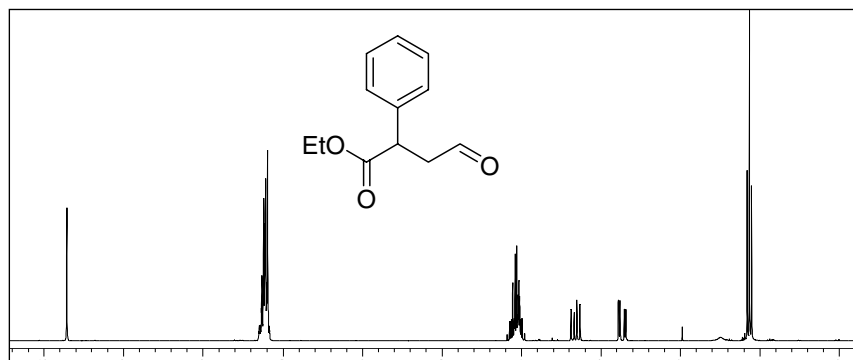

<sup>1</sup>H NMR (250 MHz, CDCl<sub>3</sub>) of Aldehyde **14b**:

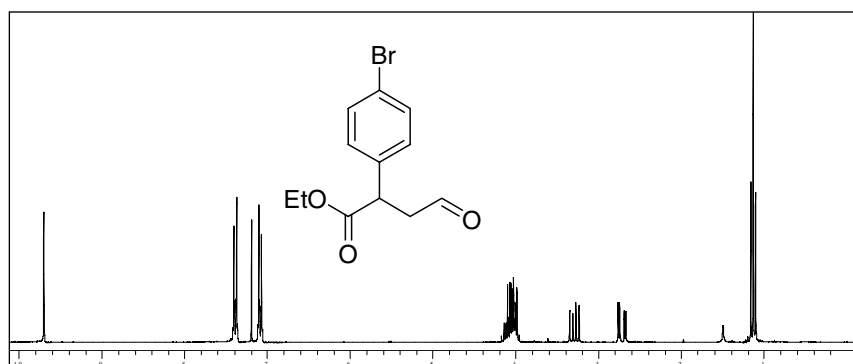

<sup>1</sup>H NMR (250 MHz, CDCl<sub>3</sub>) of Aldehyde **14c**:

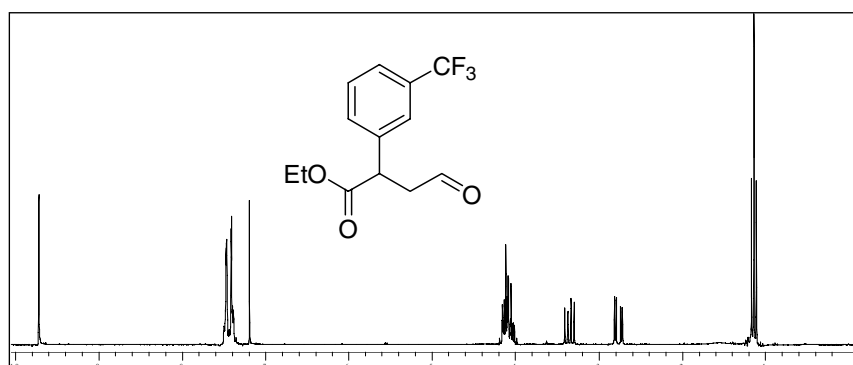

$^1\text{H}$  NMR (250 MHz,  $\text{CD}_3\text{CN}$ ) of masked aldehyde building block **2e**:

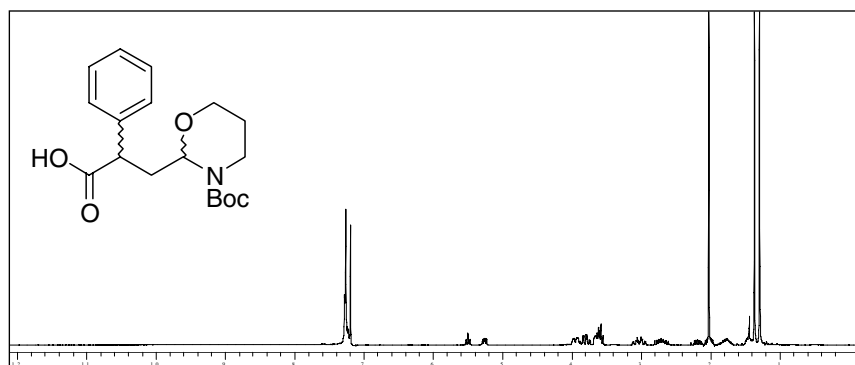

$^1\text{H}$  NMR (250 MHz,  $\text{CD}_3\text{CN}$ ) of masked aldehyde building block **2f**:

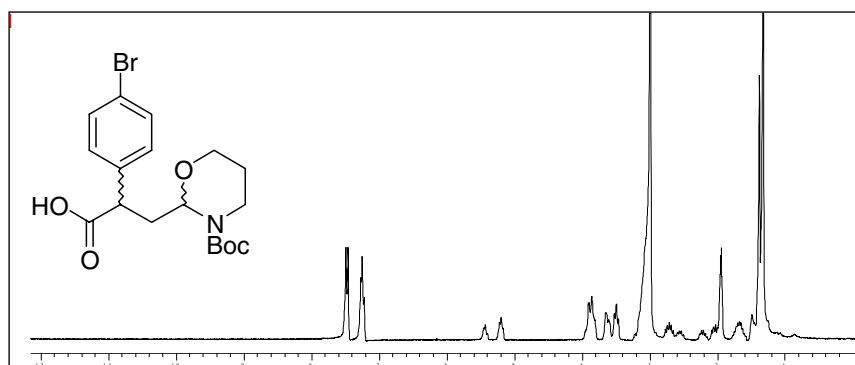

$^1\text{H}$  NMR (250 MHz,  $\text{CD}_3\text{CN}$ ) of masked aldehyde building block **2g**:

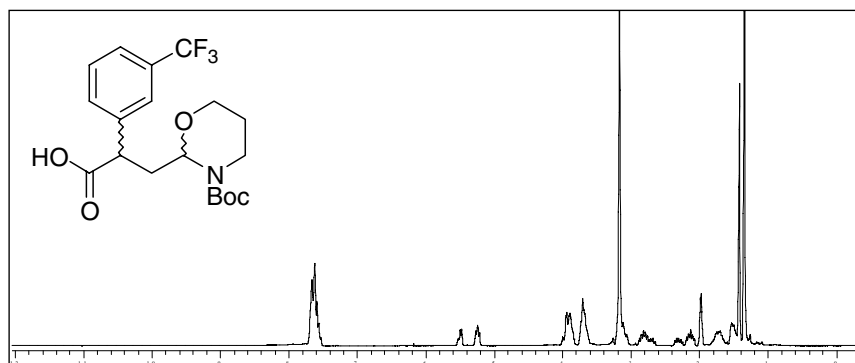

$^1\text{H}$  NMR (250 MHz,  $\text{CD}_3\text{CN}$ ) of Pictet-Spengler reaction product of *rac*-MABB1-Trp-Ile-OH (**4a**):

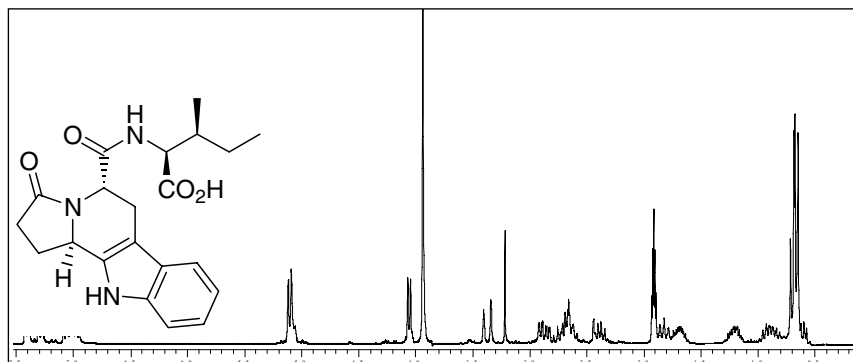

$^1\text{H}$  NMR (250 MHz,  $\text{DMSO}-d_6$ ) of Pictet-Spengler reaction product of *rac*-MABB1-(3-(2-furyl)Ala)-Ile-OH (**18a**):

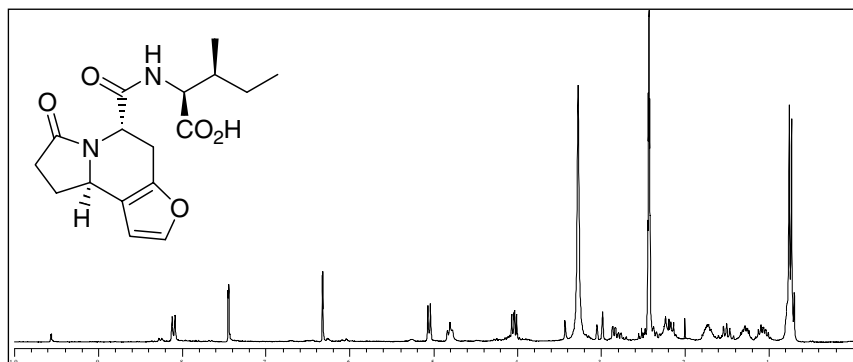

$^1\text{H}$  NMR (250 MHz,  $\text{DMSO}-d_6$ ) of Pictet-Spengler reaction product of *rac*-MABB1-(3-(2-thienyl)Ala)-Ile-OH (**18b**):

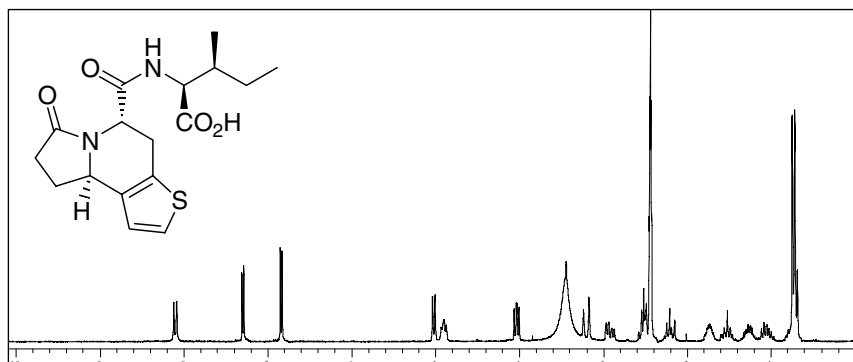

$^1\text{H}$  NMR (250 MHz,  $\text{DMSO-}d_6$ ) of Pictet-Spengler reaction product of *rac*-MABB1-(3-(3-thienyl)Ala)-Ile-OH (**18c**):

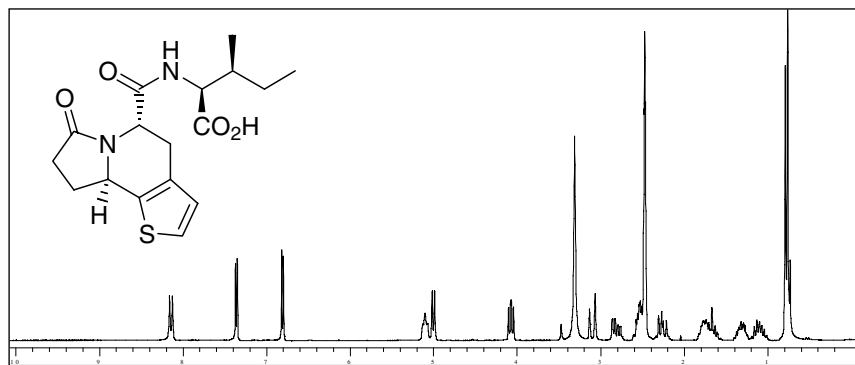

$^1\text{H}$  NMR (250 MHz,  $\text{DMSO-}d_6$ ) of Pictet-Spengler reaction product of *rac*-MABB1-(3-(3-benzothiophenyl)Ala)-Ile-OH (**18d**):

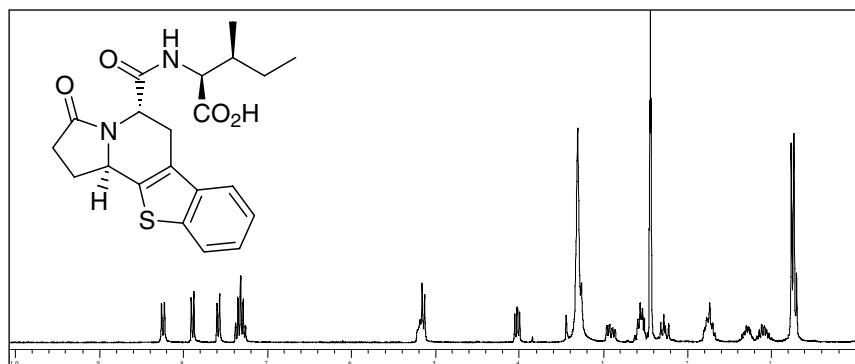

$^1\text{H}$  NMR (250 MHz,  $\text{DMSO-}d_6$ ) of Pictet-Spengler reaction product of *rac*-MABB1-(3-(3,4-dimethoxyphenyl)Ala)-Ile-OH (**18e**):

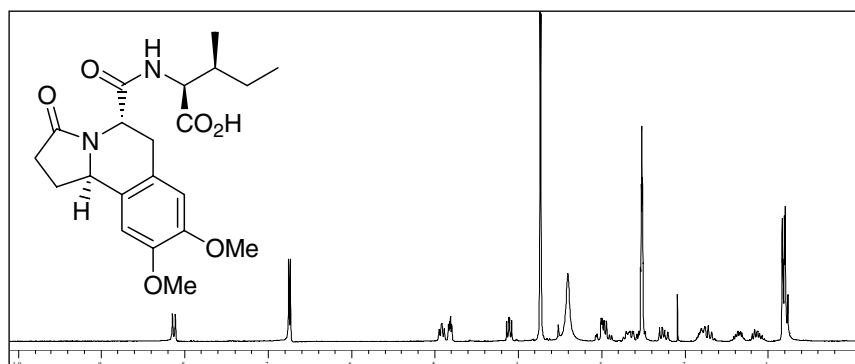

## Analytical RP-HPLC Chromatograms.

Pictet-Spengler reaction products of *rac*-MABB1-Trp-Ile-OH (**4a**):

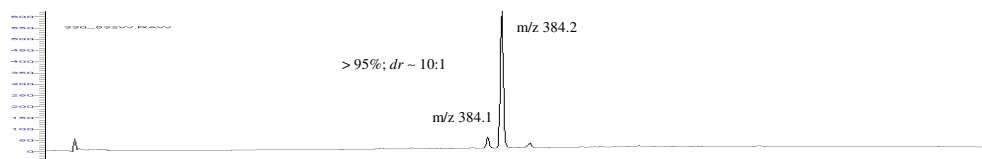

Pictet-Spengler reaction products of *rac*-MABB2-Trp-Ile-OH (**4b**):

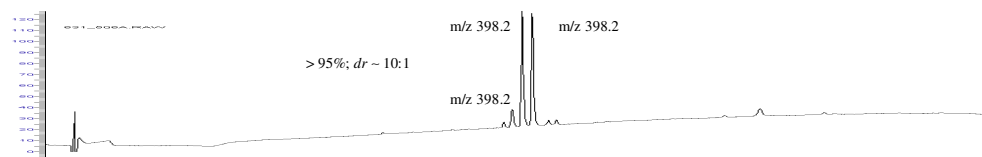

Pictet-Spengler reaction products of *rac*-MABB3-Trp-Ile-OH (**4c**):

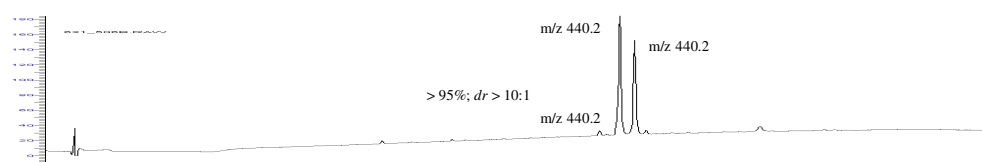

Pictet-Spengler reaction products of *rac*-MABB4-Trp-Ile-OH (**4d**):

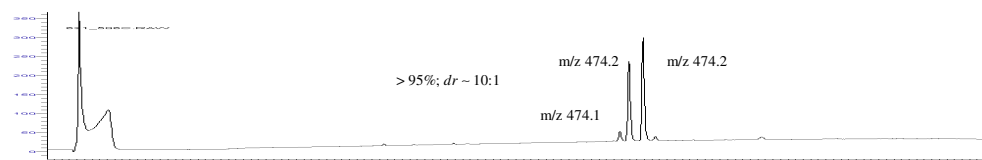

Pictet-Spengler reaction products of *rac*-MABB5-Trp-Ile-OH (**4e**):

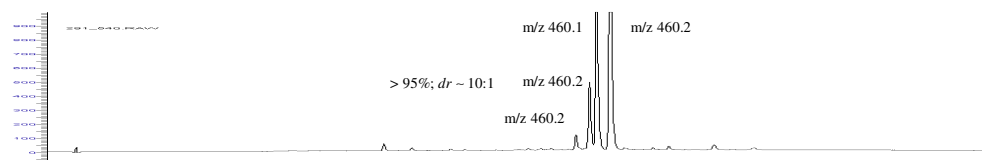

Pictet-Spengler reaction products of *rac*-MABB6-Trp-Ile-OH (**4f**):

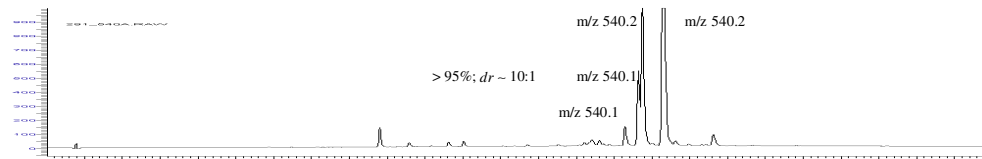

Pictet-Spengler reaction products of *rac*-MABB7-Trp-Ile-OH (**4g**):

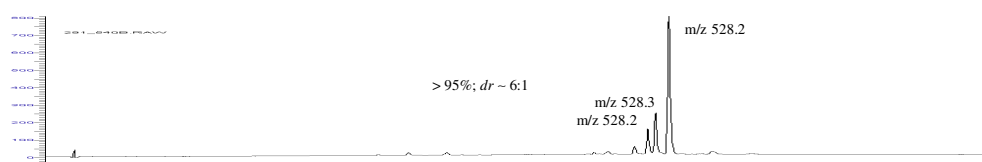



Pictet-Spengler reaction products of *rac*-MABB1-(5-Br-(D/L))Trp-Ile-OH (**16a**):

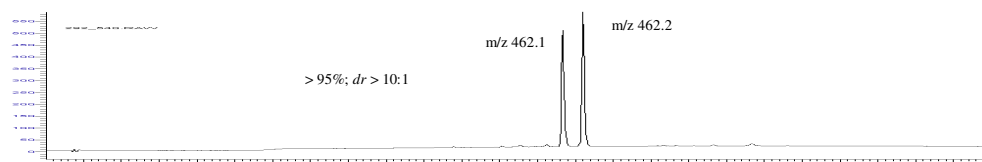

Pictet-Spengler reaction products of *rac*-MABB1-(5-MeO-(D/L))Trp-Ile-OH (**16b**):

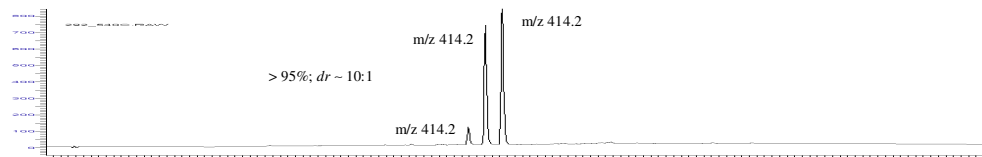

Pictet-Spengler reaction products of *rac*-MABB1-(5-BnO-(D/L))Trp-Ile-OH (**16c**):

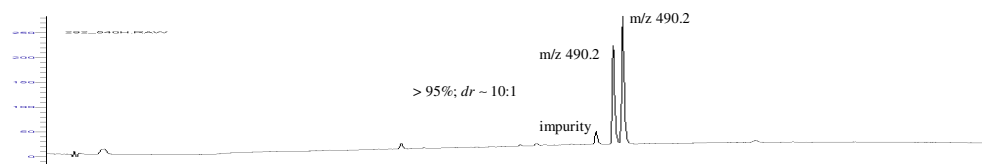

Pictet-Spengler reaction products of *rac*-MABB1-(5-F-(D/L))Trp-Ile-OH (**16d**):

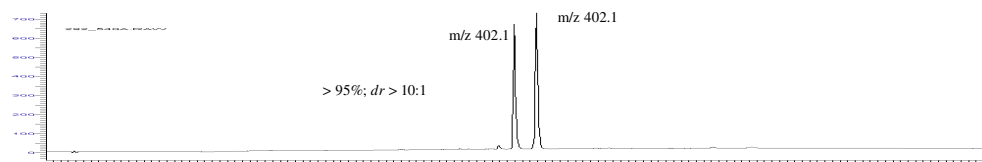

Pictet-Spengler reaction products of *rac*-MABB1-(6-F-(D/L))Trp-Ile-OH (**16e**):

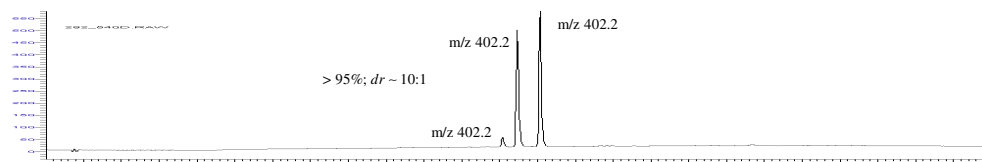

Pictet-Spengler reaction products of *rac*-MABB1-(4-Me-(D/L))Trp-Ile-OH (**16f**):

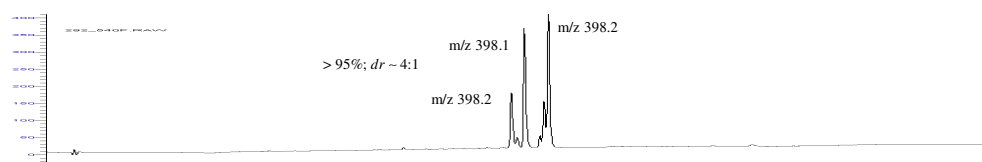

Pictet-Spengler reaction products of *rac*-MABB1-(5-Me-(D/L))Trp-Ile-OH (**16g**):

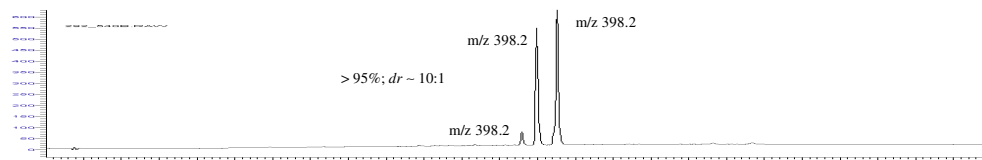

Pictet-Spengler reaction products of *rac*-MABB1-(6-Me-(D/L))Trp-Ile-OH (**16h**):

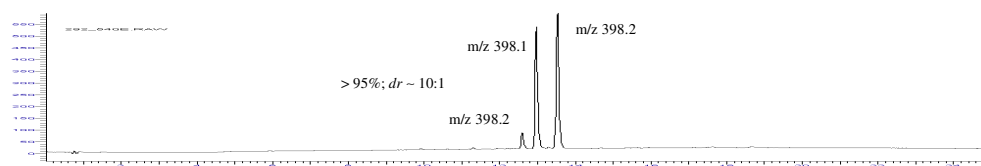

Pictet-Spengler reaction products of *rac*-MABB1-(5-OH)Trp-Ile-OH (**16i**):

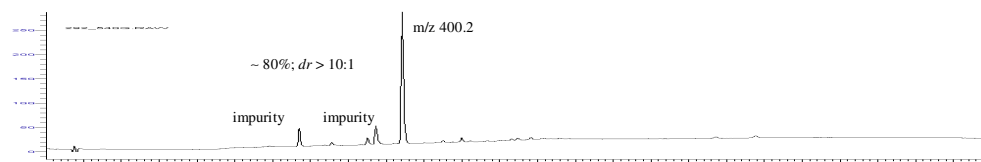

Supplement: Supplementary file 1 [file 5177167]
